# Supplementary material for: Polarizability as a tool to determine the electrostatic shielding effect of nanocarbon cages: a polarizability distribution study on noble gas endohedral fullerenes
Source: Royal Society of Chemistry journal article supplement (doi:10.1039/c6cp07978d), 2017-01-01

## Supplementary information

for

### Polarizability as a tool to determine the electrostatic shielding effect of nanocarbon cages: A polarizability distribution study on noble gas endohedral fullerenes

Liuxie Liu<sup>a</sup>, Laicai Li<sup>a</sup>, Quan Li<sup>a</sup> and Qun Zeng<sup>b,\*</sup>

<sup>a</sup>College of Chemistry and Material Science, Sichuan Normal University, Chengdu 610068, China

<sup>b</sup>Institute of Atomic and Molecular Physics, Sichuan University, Chengdu 610065, China

### Contents

**Table S1** Variation of  $\alpha(\text{NG}@C_n)$  and  $p(\text{NG})$  with cage size respectively computed at different level.

**Table S2** The average radius  $r$  for cages, the inner and outer radii of the shells ( $a$ ,  $b$ ), HOMO-LUMO gaps ( $E_{\text{gap}}$ ),  $\epsilon$ , mean polarizability ( $\langle\alpha\rangle$ ), local ( $\alpha^P$ ) and charge transfer ( $\alpha^P$ ) contributions for  $C_n$  at M06-2X/SVP level, and the polarizabilities (field penetration  $p$ ) predicted with Penn's models.

**Table S3** The radii of the uniform-field zone and the field penetration factors  $p$  at the fullerene centers computed at M06-2X/SVP level.

**Fig. S1** Electron density differences (EDDs) between carbon cages with and without NG encapsulation for  $\text{NG}@C_{40}$ . Red denotes the largest decrease in electron density, while blue denotes the largest increase in electron density. The color scale was set in range between -0.001 au and 0.001 au for left, -0.002 au and 0.002 au for right.

**Fig. S2** Electron density differences (EDDs) between carbon cages with and without NG encapsulation, calculated at LC-BLYP/SVP and PBE<sup>62</sup>/SVP level, respectively. Red denotes the largest decrease in electron density, while blue denotes the largest increase in electron density. For  $C_{40}$  and  $C_{60}$  complexes, the color scale was set in range of -0.0002 au to 0.0002 au. For  $C_{180}$  complexes, the color scale was in range of -0.00004 au to 0.00004 au.

**Fig. S3** Variations in  $p(\text{NG})$  calculated from eq. 6, and  $p$  from eq. 5, with cage size ( $n$ ) at PBE/SVP level (top) and LC-BLYP/SVP level (bottom).

**Table S1** Variation of  $\alpha(\text{NG}@C_n)$  and  $p(\text{NG})$  with cage size respectively computed at different level.

| $n$          | He@C <sub>n</sub>       |                       |                | Ar@C <sub>n</sub>       |                       |                |
|--------------|-------------------------|-----------------------|----------------|-------------------------|-----------------------|----------------|
|              | $\alpha(\text{NG}@C_n)$ | $\alpha^P(\text{NG})$ | $p(\text{NG})$ | $\alpha(\text{NG}@C_n)$ | $\alpha^P(\text{NG})$ | $p(\text{NG})$ |
| M06-2X/SVP   |                         |                       |                |                         |                       |                |
| 40           | 317.73                  | 0.04                  | 3.1            | 321.90                  | 0.59                  | 5.4            |
| 50           | 403.55                  | 0.10                  | 7.4            | 406.18                  | 0.96                  | 8.7            |
| 60           | 487.63                  | 0.21                  | 14.8           | 489.33                  | 1.38                  | 12.6           |
| 70           | 606.93                  | 0.17                  | 11.6           | 608.20                  | 1.25                  | 11.3           |
| 80           | 736.03                  | 0.14                  | 9.8            | 736.87                  | 1.11                  | 10.1           |
| 90           | 811.40                  | 0.27                  | 19.1           | 812.33                  | 1.85                  | 16.9           |
| 100          | 943.85                  | 0.23                  | 16.2           | 944.84                  | 1.90                  | 17.3           |
| 116          | 1249.67                 | 0.13                  | 9.2            | 1249.85                 | 0.78                  | 7.1            |
| 132          | 1269.46                 | 0.38                  | 26.9           | 1270.49                 | 2.87                  | 26.2           |
| 144          | 1453.87                 | 0.35                  | 24.7           | 1454.69                 | 2.66                  | 24.2           |
| 180          | 1852.79                 | 0.42                  | 29.6           |                         |                       |                |
| M06-2X/TZVP  |                         |                       |                |                         |                       |                |
| 40           | 349.72                  | 0.07                  | 4.7            | 351.84                  | 0.71                  | 6.5            |
| 50           | 441.06                  | 0.12                  | 8.6            | 442.48                  | 1.09                  | 9.9            |
| 60           | 528.95                  | 0.21                  | 14.4           | 530.49                  | 1.53                  | 14.0           |
| 70           | 654.45                  | 0.19                  | 13.1           | 655.78                  | 1.39                  | 12.7           |
| 80           | 789.25                  | 0.14                  | 10.2           | 790.07                  | 1.24                  | 11.3           |
| 90           | 867.55                  | 0.23                  | 16.4           | 868.89                  | 2.03                  | 18.5           |
| LC-BLYP/SVP  |                         |                       |                |                         |                       |                |
| 40           | 311.58                  | 0.06                  | 3.7            | 315.68                  | 0.61                  | 5.6            |
| 50           | 393.42                  | 0.14                  | 8.7            | 396.23                  | 1.03                  | 9.4            |
| 60           | 474.42                  | 0.22                  | 14.4           | 476.44                  | 1.49                  | 13.7           |
| 70           | 588.55                  | 0.22                  | 14.5           | 590.05                  | 1.49                  | 13.7           |
| 80           | 718.43                  | 0.18                  | 11.8           | 719.31                  | 1.26                  | 11.5           |
| 90           | 785.53                  | 0.33                  | 21.6           | 786.65                  | 2.20                  | 20.2           |
| 100          | 1001.28                 | 0.18                  | 11.6           | 1002.10                 | 1.17                  | 10.8           |
| 116          | 1280.02                 | 0.09                  | 5.8            | 1280.18                 | 0.55                  | 5.1            |
| 132          | 1221.35                 | 0.47                  | 30.7           | 1222.58                 | 3.21                  | 29.5           |
| 144          | 1400.96                 | 0.44                  | 28.4           | 1401.95                 | 3.00                  | 27.6           |
| 180          | 1777.59                 | 0.52                  | 33.5           |                         |                       |                |
| LC-BLYP/TZVP |                         |                       |                |                         |                       |                |
| 40           | 342.04                  | 0.08                  | 5.4            | 344.75                  | 0.75                  | 6.9            |
| 50           | 428.98                  | 0.16                  | 10.3           | 430.91                  | 1.16                  | 10.6           |
| 60           | 513.85                  | 0.24                  | 15.6           | 515.61                  | 1.63                  | 15.0           |
| 70           | 633.63                  | 0.24                  | 15.6           | 635.02                  | 1.63                  | 14.9           |
| 80           | 768.67                  | 0.20                  | 13.1           | 769.39                  | 1.40                  | 12.8           |
| 90           | 839.39                  | 0.34                  | 22.1           |                         |                       |                |

**Table S2** The average radius  $r$  for cages, the inner and outer radii of the shells ( $a$ ,  $b$ ), HOMO-LUMO gaps ( $E_{\text{gap}}$ ),  $\varepsilon$ , mean polarizability ( $\langle\alpha\rangle$ ), local ( $\alpha^P$ ) and charge transfer ( $\alpha^Q$ ) contributions for  $C_n$  at M06-2X/SVP level, and the polarizabilities (field penetration  $p$ ) predicted with Penn's models.

| $n$ | $r(\text{\AA})$ | $a(\text{\AA})^a$ | $b(\text{\AA})^b$ | $E_{\text{gap}}(\text{au})$ | $\varepsilon^c$ | $\langle\alpha\rangle$ (au) | $\alpha^P(\text{au})$ | $\alpha^Q(\text{au})$ | Penn         |
|-----|-----------------|-------------------|-------------------|-----------------------------|-----------------|-----------------------------|-----------------------|-----------------------|--------------|
| 40  | 2.91            | 2.01              | 3.81              | 0.13                        | 30.87           | 316.8                       | 89.1                  | 227.7                 | 343.1(16.0)  |
| 50  | 3.25            | 2.35              | 4.15              | 0.11                        | 47.23           | 403.0                       | 105.4                 | 297.6                 | 454.9(11.1)  |
| 60  | 3.55            | 2.65              | 4.45              | 0.16                        | 21.43           | 487.3                       | 121.3                 | 366.0                 | 522.4(23.9)  |
| 70  | 3.84            | 2.94              | 4.74              | 0.15                        | 24.25           | 606.6                       | 139.3                 | 467.3                 | 635.6(22.0)  |
| 80  | 4.11            | 3.21              | 5.01              | 0.08                        | 94.87           | 735.8                       | 156.5                 | 579.3                 | 822.4(6.3)   |
| 90  | 4.35            | 3.45              | 5.25              | 0.11                        | 44.34           | 811.0                       | 171.4                 | 639.6                 | 908.4(13.3)  |
| 100 | 4.59            | 3.69              | 5.49              | 0.09                        | 70.00           | 943.7                       | 188.7                 | 755.0                 | 1061.4(8.8)  |
| 116 | 4.93            | 4.03              | 5.83              | 0.09                        | 64.78           | 1249.6                      | 219.9                 | 1029.7                | 1267.6(9.9)  |
| 132 | 5.26            | 4.36              | 6.16              | 0.13                        | 32.80           | 1269.3                      | 236.0                 | 1033.3                | 1404.3(19.2) |
| 144 | 5.50            | 4.60              | 6.40              | 0.11                        | 44.41           | 1453.7                      | 257.1                 | 1196.6                | 1616.8(14.9) |
| 180 | 6.14            | 5.24              | 7.04              | 0.13                        | 30.71           | 1852.7                      | 310.7                 | 1542.0                | 2055.7(22.1) |

<sup>a</sup>  $a = r - \Delta$ , <sup>b</sup>  $b = r + \Delta$ ,  $\Delta = 0.9 \text{\AA}$ . <sup>c</sup>  $\varepsilon \approx 1 + (E_p/E_{\text{gap}})^2$ ,  $E_p = 20 \text{ eV}$

**Table S3** The radii of the uniform-field zone  $R$  and the field penetration factors  $p$  at the fullerene centers computed at M06-2X/SVP level.

| $n$ | $R(\text{\AA})$ |     |     | $p(\times 100\%)$ |      |      | $p$  |
|-----|-----------------|-----|-----|-------------------|------|------|------|
|     | $x$             | $y$ | $z$ | $x$               | $y$  | $z$  |      |
| 40  | 1.0             | 1.0 | 1.3 | 16.0              | 22.7 | 21.9 | 20.2 |
| 50  | 1.5             | 1.5 | 0.8 | 26.3              | 26.3 | 18.6 | 23.7 |
| 60  | 1.5             | 1.5 | 1.5 | 26.4              | 26.4 | 26.4 | 26.4 |
| 70  | 1.8             | 1.8 | 2.0 | 20.7              | 20.7 | 25.4 | 22.3 |
| 80  | 1.5             | 1.5 | 2.8 | 15.6              | 15.6 | 23.0 | 18.1 |
| 90  | 2.5             | 2.0 | 2.5 | 24.0              | 24.8 | 26.4 | 25.1 |
| 100 | 2.5             | 2.5 | 2.5 | 21.6              | 23.9 | 22.6 | 22.7 |
| 116 | 3.0             | 3.0 | 3.0 | 10.7              | 10.7 | 10.7 | 10.7 |
| 132 | 3.0             | 3.0 | 4.5 | 28.8              | 28.8 | 29.4 | 29.0 |
| 144 | 3.5             | 3.5 | 2.8 | 24.2              | 24.1 | 28.7 | 25.7 |
| 180 | 4.0             | 4.0 | 4.0 | 29.7              | 29.7 | 29.7 | 29.7 |

**Fig. S1** Electron density differences (EDDs) between carbon cages with and without NG encapsulation for NG@C<sub>40</sub>. Red denotes the largest decrease in electron density, while blue denotes the largest increase in electron density. The color scale was set in range between -0.001 au and 0.001 au for left, -0.002 au and 0.002 au for right.

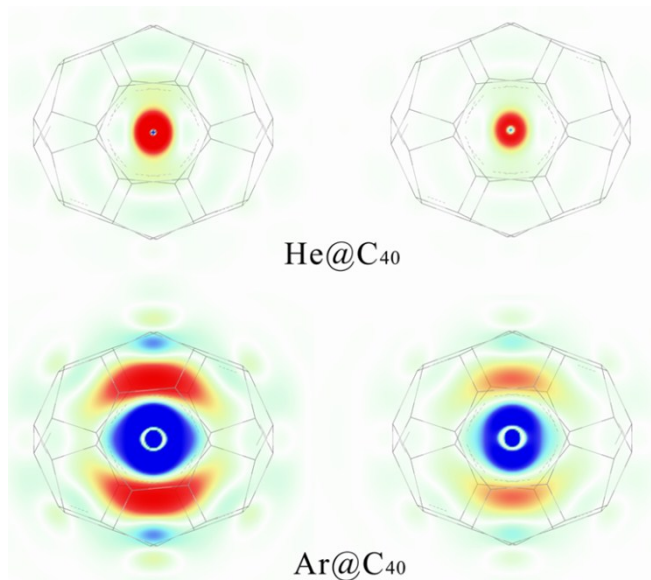

**Fig. S2** Electron density differences (EDDs) between carbon cages with and without NG encapsulation, calculated at LC-BLYP/SVP and PBE<sup>62</sup>/SVP level, respectively. Red denotes the largest decrease in electron density, while blue denotes the largest increase in electron density. For C<sub>40</sub> and C<sub>60</sub> complexes, the color scale was set in range of -0.0002 au to 0.0002 au. For C<sub>180</sub> complexes, the color scale was in range of -0.00004 au to 0.00004 au.

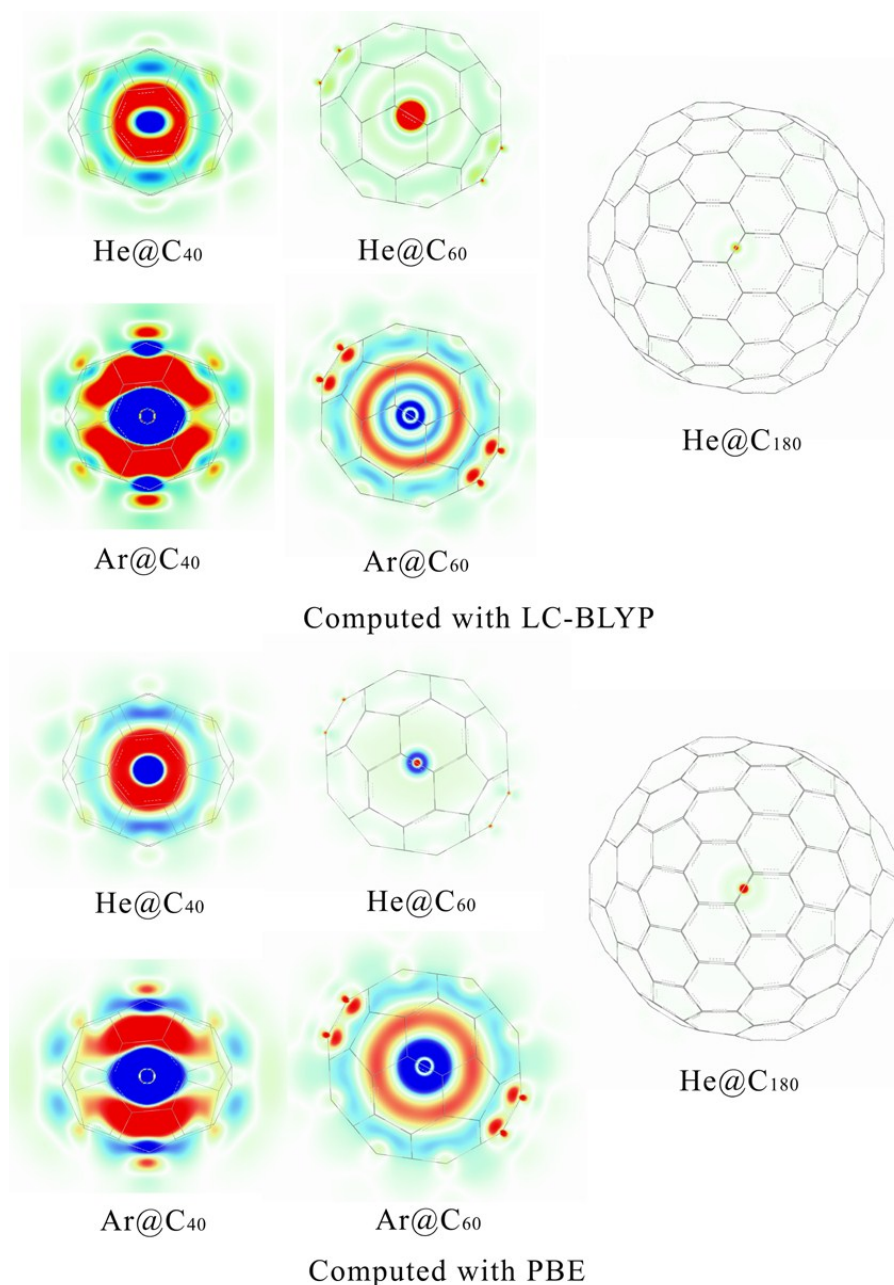

62. J. P. Perdew, K. Burke and M. Ernzerhof, *Phys. Rev. Lett.*, 1996, **77**, 3865-3868.

**Fig. S3** Variations in  $p(\text{NG})$  calculated from eq. 6, and  $p$  from eq. 5, with cage size ( $n$ ) at PBE/SVP level (top) and LC-BLYP/SVP level (bottom), respectively.

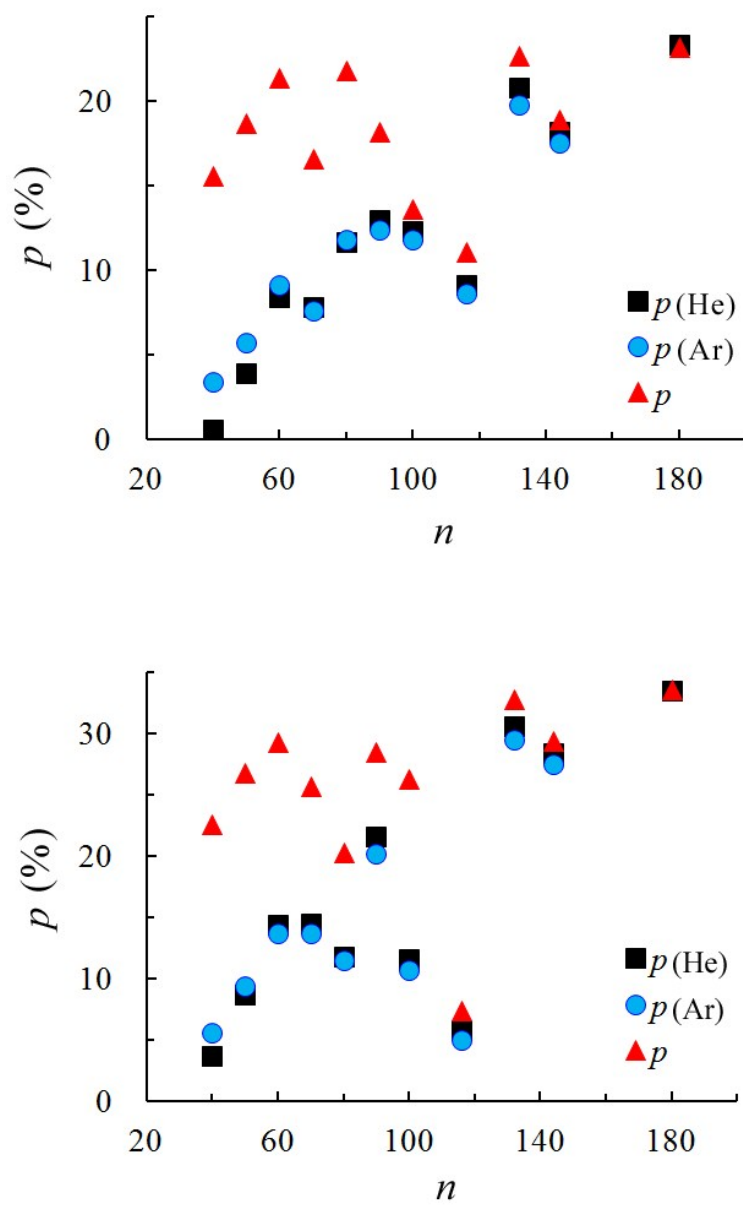

Supplement: c6cp07978d1.pdf [file c6cp07978d1.pdf]
